1 **Co-translational ribosome pairing enables native assembly of misfolding-prone subunits**

2

3

4 Florian Wruck<sup>1</sup>, Jaro Schmitt<sup>2,‡</sup>, Kai Fenzl<sup>2,3,‡</sup>, Matilde Bertolini<sup>2,4,‡</sup>, Alexandros Katranidis<sup>5</sup>,  
5 Bernd Bukau<sup>2,6</sup>, Günter Kramer<sup>2,6</sup>, Sander Tans<sup>1,7\*</sup>.

6

7 <sup>1</sup>AMOLF, Science Park 104, 1098 XG Amsterdam, The Netherlands

8 <sup>2</sup>Center for Molecular Biology of Heidelberg University (ZMBH) and German Cancer Research Center (DKFZ), DKFZ-  
9 ZMBH Alliance, Im Neuenheimer Feld 329, Heidelberg D-69120, Germany

10 <sup>3</sup>Current address: European Molecular Biology Laboratory, Genome Biology Unit, Meyerhofstrasse 1, Heidelberg,  
11 Germany, 69117

12 <sup>4</sup>Current address: Stanford University School of Medicine, 1291 Welch Rd, Stanford, CA 94305

13 <sup>5</sup>Forschungszentrum Juelich, Institute of Biological Information Processing, IBI-6: Cellular Structural Biology, 52428  
14 Juelich, Germany

15 <sup>6</sup>German Cancer Research Center (DKFZ), Im Neuenheimer Feld 280, D-69120 Heidelberg, Germany

16 <sup>7</sup>Bionanoscience Department of Delft University of Technology and Kavli Institute of Nanoscience Delft, 2629HZ  
17 Delft, The Netherlands

18

19 <sup>‡</sup>These authors contributed equally

20 <sup>\*</sup>Correspondence: [tans@amolf.nl](mailto:tans@amolf.nl)

1 **Abstract**

2 Protein complexes are pivotal to most cellular processes. Emerging evidence indicates that  
3 pairs of ribosomes ubiquitously drive the synchronized synthesis and assembly of two protein  
4 subunits into homodimeric complexes<sup>1-5</sup>. These observations suggest protein folding  
5 mechanisms of general importance enabled by contacts between nascent chains<sup>6,7</sup> – which  
6 have thus far rather been considered detrimental<sup>8,9</sup>. However, owing to their dynamic and  
7 heterogeneous nature, the folding of interacting nascent chains remains unexplored. Here, we  
8 show that co-translational ribosome pairing allows their nascent chains to ‘chaperone each  
9 other’, thus enabling the formation of coiled-coil homodimers from subunits that misfold  
10 individually. We developed an integrated single-molecule fluorescence and force spectroscopy  
11 approach to probe the folding and assembly of two nascent chains extending from nearby  
12 ribosomes, using the intermediate filament lamin as a model system. Ribosome proximity in  
13 early translation stages was found to be critical: when interactions between nascent chains are  
14 inhibited or delayed, they become trapped in stable misfolded states that are no longer  
15 assembly competent. Conversely, early interactions allow the two nascent chains to nucleate  
16 native-like quaternary structures that grow in size and stability as translation advances. We  
17 conjecture that protein folding mechanisms enabled by ribosome cooperation are more broadly  
18 relevant to intermediate filaments and other protein classes.

## 1 **Main**

2 Cells rely on the faithful production of protein complexes. According to textbook models, newly  
3 translated polypeptides first undergo a conformational search for the native tertiary structure<sup>10-</sup>  
4 <sup>12</sup>, and then a diffusion-driven assembly into larger complexes<sup>13,14</sup>. This paradigm is challenged  
5 by mounting evidence of co-translational assembly, either between a fully-formed diffusing  
6 subunit and a nascent chain<sup>15-20</sup> (termed “co-post assembly”), or between two nascent chains<sup>1-4</sup>  
7 (termed “co-co assembly”). We recently revealed over 800 co-co assembling homodimers, thus  
8 showing the general nature of this biogenesis route<sup>5</sup>. However, the biochemical methods and  
9 disome selective ribosome profiling (DiSP)<sup>5</sup> employed thus far do not detect the nascent chain  
10 structures nor the conformational changes during the folding and assembly process. Single-  
11 molecule fluorescence and optical-tweezers methods have made important advances in  
12 studying nascent chain folding but remain limited to single ribosome-nascent chain complexes  
13 (RNCs)<sup>12,21,22</sup>. As a result, we lack insight into the conformational basis and functional relevance  
14 of protein complex assembly enabled by coupled ribosomes.

15 Here we study these issues using the human intermediate filament lamin, whose homodimeric  
16 coiled-coil structure represents the largest co-co assembly class<sup>5</sup>. Lamins form a scaffold for the  
17 nuclear envelope that spatially organizes chromatin<sup>23,24</sup>, with mutants being the root cause for  
18 diseases including premature ageing and cardiomyopathies<sup>25</sup>. Lamin A and its splice variant  
19 lamin C contain three domains<sup>26-28</sup>: the N-terminal unstructured head domain, the central  $\alpha$ -  
20 helical rod domain that mediates dimer formation (Fig. 1A-B, Extended Data Fig. 1), and the C-  
21 terminal tail domain with an immunoglobulin-like fold<sup>29</sup>. Lamin polymerization occurs by head-to-  
22 tail assembly of lamin homodimers<sup>30</sup>. The lack of lamin heterodimers<sup>31</sup>, even though lamin A  
23 and C have identical dimerization domains, led to suggestions of a post-translational sorting  
24 mechanism that recognizes the different tail domains<sup>32</sup>. Co-co assembly can alternatively  
25 promote isoform-specific homomer formation, and more generally avoid promiscuous  
26 interactions between conserved oligomerization domains<sup>33</sup>.

27

## 28 ***In vivo* detection of lamin nascent chain interactions**

29 We first studied the onset of lamin co-co assembly *in vivo*, including the dependence on cell  
30 type (U2OS and HEK cells) and DiSP isolation conditions, which can influence the detected  
31 assembly onset (Fig. 1B, Extended Data Fig. 2). The DiSP method is based on isolating RNC  
32 pairs that are coupled via their nascent chains (disomes), as well as uncoupled RNCs  
33 (monosomes), followed by sequencing their protected RNA footprints as in standard ribosome  
34 profiling. Consistently, for lamin RNC pairs, the number of mRNA reads increased after  
35 synthesis of coil 1B (after 250 residues), as the reads decreased for the uncoupled RNCs<sup>5</sup>. The

1 increased level of RNC pairs persisted during synthesis of the rod domain, while the uncoupled  
2 RNC level did not recover. This transition was not affected by salt or crosslinking conditions  
3 (Extended Data Fig. 2), indicating robustness of lamin assembly onset detection using DiSP.  
4 However, such approaches to purify RNC pairs from cells are less suited to study nascent chain  
5 conformations<sup>5,34,35</sup>, due to RNC heterogeneity and difficulty of incorporating measurement  
6 probes. Hence, we aimed to construct RNC pairs *in vitro*, stalled at key phases of translation  
7 identified by the DiSP data: before the onset of dimerization, with only the small  $\alpha$ -helical coil 1A  
8 fully translated, after the dimerization onset with coils 1A and 1B fully translated, and finally after  
9 translation of coil 2AB, with the full-length rod domain translated and ribosome exposed (Fig.  
10 1B).

11

### 12 ***In vitro* formation of lamin RNC pairs**

13 To construct pairs of RNCs coupled by their nascent chains, we first linked biotinylated  
14 ribosomes to polystyrene beads via 5 kbp DNA handles (Fig. 1C). Synthesis of lamin nascent  
15 chains by the bead-tethered ribosomes was performed by *in vitro* transcription-translation, using  
16 the 'SecM strong' sequence to stall translation at positions indicated above (Fig. 1B, Extended  
17 Data Fig. 3). Two such beads were captured by two optical traps, repeatedly brought together,  
18 within about 200 nm for about 5 seconds, and separated again. We quantified the fraction of  
19 approach-retract cycles in which a tether formed between the beads that was twice the length of  
20 a single DNA handle (Extended Data Fig. 4), and hence indicated coupling of two RNCs via  
21 their nascent chains (Fig. 1C). This fraction increased from below 10% to above 50% with  
22 increasing fragment length (Fig. 1D). Such an increasing trend agrees with the lamin DiSP data  
23 (Fig. 1B), and with coupling taking place *via* the nascent chains, rather than *via* other  
24 (ribosomal) components. While rare, we did detect dimerization events already for the shortest  
25 fragment, indicating an earlier assembly onset than detectable by DiSP (Fig. 1B). Shorter  
26 nascent chain dimers may be less stable and therefore escape detection by DiSP. To probe the  
27 stability of the nascent chain dimers against dissociation, we measured the force required to  
28 rupture the tether by increasing the distance between the beads. The tethers ruptured in a  
29 single step, in line with coiled-coils unfolding and dissociating discretely during pulling<sup>36</sup>. The  
30 rupture force indeed increased with fragment length, from about 5 pN to over 15 pN (Fig. 1E),  
31 consistent with a progressively larger coiled-coil dimer interface. Overall, the data indicated that  
32 lamin nascent chains dimerized when brought in close proximity, with loose associations  
33 starting at short chain lengths and increased stability with increasing chain length.

34

35

## 1 **Nascent lamin complex formation observed by fluorescence**

2 To test whether the observed nascent dimers are consistent with the native coiled-coil lamin  
3 structure, we integrated fluorescence detection into the optical tweezers assay (Fig. 2A). We  
4 inserted a pair of adjacent cysteines at the lamin N-terminus and reasoned that two such pairs  
5 should co-localize in the native parallel coiled-coil conformation. Hence, a bipartite tetra-  
6 cysteine motif would form that can bind the FIAsh dye<sup>37</sup>, which becomes fluorescent upon  
7 binding, and detectable by confocal fluorescence imaging. We performed the above approach-  
8 retraction protocol to form a lamin RNC pair and exposed it to FIAsh in solution. To detect  
9 bound FIAsh, a confocal fluorescence excitation beam was scanned across the beads and  
10 along the connecting tether. A fluorescent signal indeed appeared in-between the beads, visible  
11 as an additional line in kymographs that display the subsequent fluorescence emission scans  
12 (Fig. 2B). The two lamin N-termini were thus in close proximity, in line with the native coiled-coil  
13 structure of lamin dimers (Fig. 1A). The longer fragments again showed higher dimer formation  
14 frequency (Extended Data Fig. 5), consistent with the previous measurements in the absence of  
15 FIAsh (Fig. 1D).

16

## 17 **Delayed RNC interaction promotes non-native lamin dimer conformations**

18 The above experiments showed that dimers of nascent lamin chains can be formed *in situ* but  
19 did not provide insight into unsuccessful assembly attempts or folding errors. We surmised the  
20 split FIAsh-tags may keep the N-termini connected after full unfolding, which could allow us to  
21 directly follow dimer formation and dissociation, including underlying conformational changes.  
22 Upon RNC coupling and FIAsh exposure, tethers indeed remained intact after lamin dimers  
23 were unfolded by stretching, as evidenced by a force drop to a non-zero level and continued  
24 presence of the fluorescence signal (Fig. 2B). Note that the fluorescence signal is not visible at  
25 the lowest forces because the molecular tether is then not properly positioned in the confocal  
26 imaging plane. The force and fluorescence signals disappeared when the tether fully ruptured,  
27 which could be due to FIAsh, Dig-AntiDig, or biotin-neutravidin dissociation, but whose rupture  
28 force should not depend on nascent chain length. Accordingly, we found similar rupture forces  
29 for all three constructs (Extended Data Fig. 6). In this manner, nascent chain dimers could be  
30 cyclically unfolded by stretching and then given a chance to reform by relaxation (Fig. 3A).

31 Four classes of behaviour were observed (Fig. 3B, Extended Data Fig. 7), with individual RNC  
32 pairs showing different classes from one cycle to the next (Extended Data Fig. 8). The chains  
33 were for the largest part either: (1) initially unfolded, and remaining so throughout the stretch-  
34 relax cycle, (2) initially compact and gradually decompacting during stretching (or conversely  
35 becoming gradually more compact during relaxation), with the data resembling previous pulling

1 experiments on stretched linear  $\alpha$ -helices<sup>38,39</sup>, (3) initially compact and unfolding discretely,  
2 consistent with the formation and unfolding of the coiled-coil dimer<sup>40</sup> (see also Fig. 2B), or (4)  
3 initially compact and remaining so throughout the cycle, with the applied force unable to unfold  
4 the structure.

5 The compacted states (4) indicated the formation of stable non-native conformations that differ  
6 from coiled-coil or linear  $\alpha$ -helical structures<sup>41</sup>. These states were preserved for multiple cycles  
7 until the tether ruptured, indicating that the nascent chains could no longer form coiled-coil-like  
8 dimers. Conversely, unfolded (1) and  $\alpha$ -helical-like states (2) could transition to the coiled-coil-  
9 like state that unfolded in discrete steps (3) (Extended Data Fig. 8). In line with these data and  
10 the increased dimerization propensity with nascent chain length (Fig. 1D), class (3) was found to  
11 increase in frequency with nascent chain length, while classes (1) and (2) decreased (Fig. 3C).  
12 Notably, class (4) was only observed for the longest fragment (Fig. 3B, C, Extended Data Fig.  
13 7). Note that the two nascent chains are in late stages of translation when they interact in these  
14 relax-stretch experiments. Overall, these data indicated that two neighbouring nascent chains  
15 can adopt  $\alpha$ -helical and coiled-coil dimer structures early during translation, which grow as  
16 translation progresses. Alternatively however, non-native states are promoted when the  
17 interactions between chains are delayed until later phases of translation.

### 19 **Co-co assembly suppresses intra-chain lamin misfolding**

20 A key question concerns the conformational competition that determines the different observed  
21 folding pathways. Native complex formation can be in competition with aggregation interactions  
22 between the chains, or misfolding interactions within chains – both of which could yield the  
23 observed non-native states (Fig. 3). To address this issue, we probed single ribosome-  
24 associated lamin nascent chains, in absence of partnering RNCs (Fig. 4A). First, we generated  
25 stalled ribosomes tethered to beads via 5 kbp DNA handles as before, while using suppressor  
26 tRNAs to biotinylate the nascent chains N-terminally. After trapping one bead, the biotinylated  
27 nascent chain was linked to a second trapped bead via another 5 kbp DNA handle. Next, we  
28 cyclically first separated and subsequently approached the two optical traps, thus stretching and  
29 relaxing the  $\alpha$ -helical lamin rod domains by their N- and C-termini, for all three lamin fragments  
30 (Fig. 4A).

31 With single RNCs, we observed three of the four classes (Fig. 4B-C, Extended Data Fig. 9): (1)  
32 unfolded, (2)  $\alpha$ -helix-like, and (4) non-native. As expected, the discrete unfolding of the coiled-  
33 coil-like dimer class (3) was not detected. Most notable was the prominence of the non-native  
34 class (4). This class was observed for all fragments, at frequencies ranging from 20% for the  
35 shortest to 60% for the longest (Fig. 4C), while for the RNC pairs it was detected for the longest

1 fragment only, and at a low frequency of 20% (Fig. 3C). These data indicate that in absence of  
2 another lamin nascent chain, the individual lamin nascent chains were prone to form compact  
3 and stable non-native structures. Indeed,  $\alpha$ -helices can form misfolds that have high contact-  
4 order and are hence compact<sup>42</sup>. Conversely, the presence of a second nascent chain  
5 suppressed this lamin misfolding while enabling the coiled-coil-like assembly. Hence, native  
6 structure formation here is not inhibited but instead promoted by interactions between nascent  
7 polypeptide chains.

## 9 Discussion

10 In this study, we report that by coupling co-translationally, RNC pairs can drive the assembly of  
11 coiled-coil homodimers composed of subunits that misfold individually (Fig. 4D). We find that  
12 RNC proximity and translation biases the competition between native and non-native contacts,  
13 which both can form either within single chains or between two chains. Specifically, residues  
14 that are translated early can form non-native contacts with chain segments that are translated  
15 later (Fig. 4D, red arrows), which compete with native coiled-coil contacts (Fig. 4D, green  
16 arrows). Timely formation of the latter native contacts between nascent chains allows the  
17 realization of partial coiled coils, which grow in size and stability as translation proceeds (Fig.  
18 4E). Conversely, non-native contacts are promoted when the RNCs either cannot interact, or  
19 interaction is delayed until later phases of translation. Lamin nascent chains then misfold and  
20 are no longer assembly competent (Fig. 4B-C). These risks should be further aggravated when  
21 assembly is postponed until after translation, and the monomeric lamin subunits must diffuse  
22 through the cytosol in order to dimerize (Fig. 4F). Overall, nascent chain interactions during  
23 translation thus provide a reciprocal chaperoning function that suppresses misfolding, in  
24 contrast with the view that high local nascent chains concentrations promote aggregation<sup>43</sup>.

25 The ability to synthesise complexes composed of misfolding-prone subunits may be of broad  
26 relevance to cells, as it expands the range of possible protein structures and functions. Indeed,  
27 the elongated lamin shape renders the lamin subunits prone to misfolding in monomeric form,  
28 yet is also key to its unique mechanical properties<sup>44</sup>. The underlying mechanism of coupled  
29 folding and assembly by RNC pairs is likely more widely relevant, given the recently observed  
30 prevalence of RNC pairing for coiled-coil and other homodimer classes, including BTB and Rel  
31 homology domain proteins<sup>5</sup>, and may extend to heterodimers, higher-order oligomers, as well  
32 as membrane-based biogenesis. Hence, it may contribute to understanding the architecture and  
33 (mutation-induced) misfolding of proteins ranging from intermediate filaments to major  
34 regulatory and metabolic proteins such as initiation factor 2B and Fatty Acid Synthase.  
35 Furthermore, the findings raise the question whether the formation and translation synchrony of  
36 RNC pairs is controlled. The latter may be achieved by sequence-induced translational pausing

1 or regulatory factors, as recently studied in ribosome collision detection<sup>45</sup>. Finally, the results  
2 may open up new routes in artificial protein and mRNA therapy design.

3 **Acknowledgements** Work in the group of S.J.T. is supported by the Netherlands Organization  
4 for Scientific Research (NWO). M.B. and K.F. were supported by a HBIGS PhD fellowship. M.B.  
5 was additionally supported by a Boehringer Ingelheim Fonds (BIF) PhD fellowship. F.W.  
6 received funding from the European Union's Horizon 2020 Research and Innovation  
7 Programme under the Marie Skłodowska-Curie grant agreement No 745798. This work was  
8 supported by the Helmholtz-Gemeinschaft (DKFZ NCT3.0 Integrative Project in Cancer  
9 Research (DysregPT\_Bukau 1030000008 G783)), the European Research Council (ERC  
10 Advanced grant (743118), and the Klaus Tschira Foundation. J.S., K.F. and M.B. are members  
11 of the Heidelberg Biosciences International Graduate School (HBIGS).

12

13 **Author Contributions** Conceptualization: F.W., J.S., K.F., M.B., B.B., G.K., S.J.T.  
14 Methodology: F.W., J.S., K.F., M.B., B.B., G.K., S.J.T. Biotinylated ribosomes: A. K.  
15 Experiments: F.W., J.S. Formal analysis, and data visualization: F.W., K.F., M.B., B.B., G.K.,  
16 S.J.T. Writing: all authors. Supervision: S.T., B.B. and G.K.

17 **Declaration of Interests** The authors declare no competing financial interests. Correspondence  
18 and requests for materials should be addressed to S.J.T. ([tans@amolf.nl](mailto:tans@amolf.nl)).

19

20

21

22

23

24

25

26

27

28

29

30



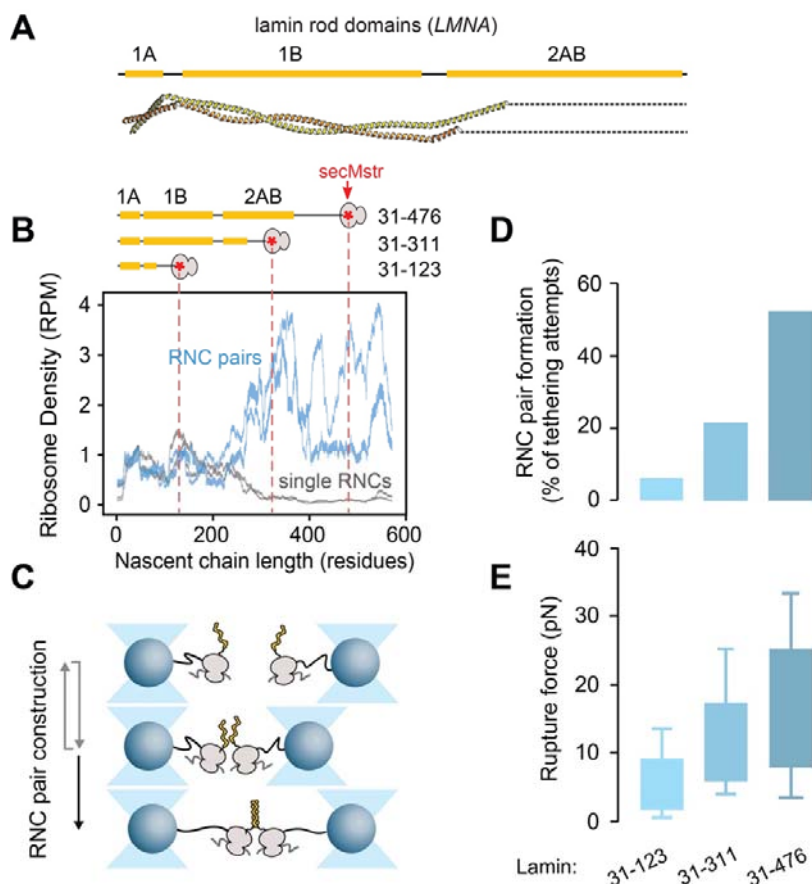

1  
2 **Fig. 1: Formation of lamin RNC pairs.** **A)** Structure of the lamin A/C homodimer showing the coiled-coil  
3 rod domains 1A, 1B and a part of domain 2AB (PDB code: 6JLB<sup>46</sup>). **B)** Lamin RNC pairing *in vivo*.  
4 Bottom: Ribosome density along the *LMNA* mRNA for RNC pairs (pairing *via* the nascent chains, blue)  
5 and for single RNCs (grey), as obtained by DiSP for U20S cells, with 150 mM KCl and crosslinker present  
6 upon cell lysis. Two replicate data sets are shown, as bars representing the position-wise 95% Poisson  
7 confidence intervals corrected for library size and smoothed with 15-codon wide sliding window<sup>5</sup>. RPM:  
8 reads per million. Top: Lamin nascent chain fragments for optical tweezer experiments (panel C). Dashed  
9 lines: ribosome stalling positions. SecMstr: peptide sequence for efficient translation stalling. Yellow bars:  
10 coiled-coil domains. Also indicated are the amino acids of the three fragments. **C)** Optical tweezer  
11 approach to constitute RNC pairs. Ribosomes, coupled to beads via DNA handles, translate lamin  
12 fragments until a secMstr mediated translation arrest using *in vitro* transcription-translation. Next,  
13 the beads are repeatedly brought together for 5 seconds, to let nascent chains interact and dimerize, and  
14 separated again (grey arrows). A stable tether upon pulling, of twice the DNA handle length, indicates  
15 dimer formation (black arrow), while no tether is formed when the chains do not dimerize. **D)** The fraction  
16 of dimerization attempts yielding dimer formation, determined as depicted in panel C, for three lamin  
17 fragments ( $n = 136$  *LMNA*<sub>31-123</sub>,  $n = 140$  *LMNA*<sub>31-311</sub>,  $n = 46$  *LMNA*<sub>31-476</sub> cycles). **E)** Rupture force of  
18 nascent chain dimer tethers, as measured by ramping up the tether tension, for three lamin fragments ( $n$   
19  $= 8$  *LMNA*<sub>31-123</sub>,  $n = 30$  *LMNA*<sub>31-311</sub>,  $n = 24$  *LMNA*<sub>31-476</sub> rupturing events).

20

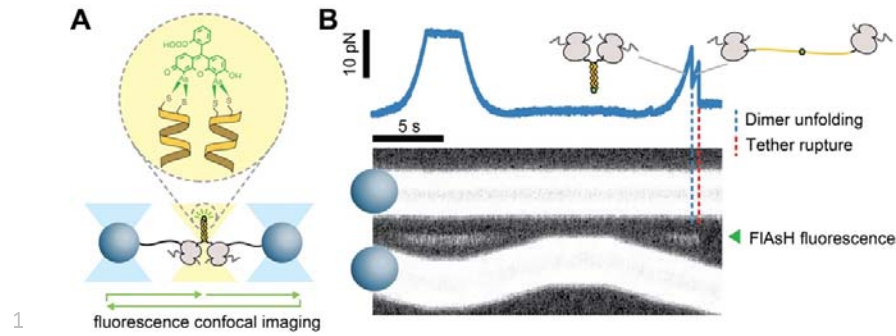

**Fig. 2: Fluorescent detection of nascent lamin dimers. A)** Approach for visual verification of N-terminal co-localization. Two nascent chain N-termini can be linked by the FIAsH dye, if they co-localize as in the native coiled-coil dimer structure (Fig. 1A), using two N-terminally incorporated cysteines. Bound fluorescent FIAsH is detected by scanning a confocal excitation beam (yellow beam, green arrows) along the molecular tether, while the optical tweezers laser beams (blue) trap the beads. **B)** Corresponding data. Bottom: detected fluorescence scans in time, showing bead movements in stretch-relax cycles and the FIAsH fluorescence signal between the two beads (green arrowhead), when the tether is under tension and hence stably in focus. RNC pair construct: *LMNA*<sub>31-476</sub>. Top: corresponding measured force acting on the beads and tether. Blue dashed line: sudden drop in force indicates unfolding, while FIAsH keeps the N-termini connected (see panel A). Red dashed line: tether rupture, likely by dissociation of one of the DNA handles from the bead surface.

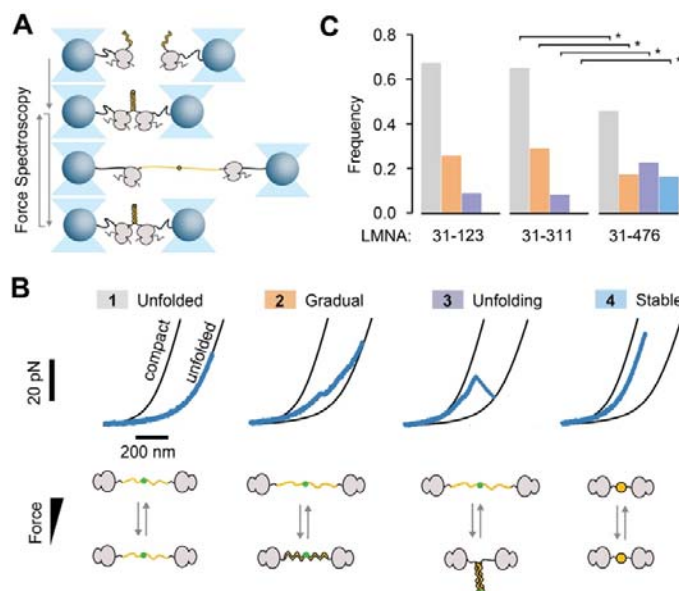

**Fig. 3: Delayed RNC interaction promotes non-native lamin dimer conformations. A)**

Diagram of nascent chain dimer force spectroscopy approach. Lamin nascent chain dimers are formed as depicted in Fig. 1 C, and subsequently exposed to repeated stretching and relaxation while the split-FIAsH-tag (green dot, see also Fig. 2A) keeps N-termini bound together upon unfolding. **B)** Classes of force-extension behaviour of lamin nascent chain dimers. Black lines are theoretical worm-like chain (WLC) curves for both nascent chains being compact (left) or fully unfolded (right). The position of the measured data (blue) in between these two reference curves indicates what fraction of the nascent chain (how many amino acids) is in the compact state, and what fraction is in the extended state. During stretch-relax cycles four classes are observed, with the majority of the chain: (1) remaining unfolded, (2) initially compact and extending and compact gradually under tension, as expected for linear  $\alpha$ -helices, (3) initially compact and unfolding discretely below 45 pN, as expected for coiled-coil dimer structures, (4) initially compact and remaining so up to 45 pN, typically for multiple stretch-relax cycles, indicative a kinetically trapped misfolded state (3). Data is shown for  $LMNA_{31-476}$  fragments. **C)** Frequency of stretch-relax cycles with observed force-extension features (see panel B), for lamin nascent chain dimers of three nascent chain lengths ( $n = 14 LMNA_{31-123}$  molecules, 24 pulling cycles,  $n = 38 LMNA_{31-311}$  molecules, 53 pulling cycles,  $n = 65 LMNA_{31-476}$  molecules, 112 pulling cycles). Dimer formation and misfolding increases in frequency with increasing nascent chain length, at the expense of unfolded states. Star: significant difference ( $p < 0.05$ ). Colours are as in panel B.

1  
2  
3  
4  
5  
6  
7  
8  
9  
10  
11  
12  
13  
14  
15  
16  
17  
18  
19

20  
21

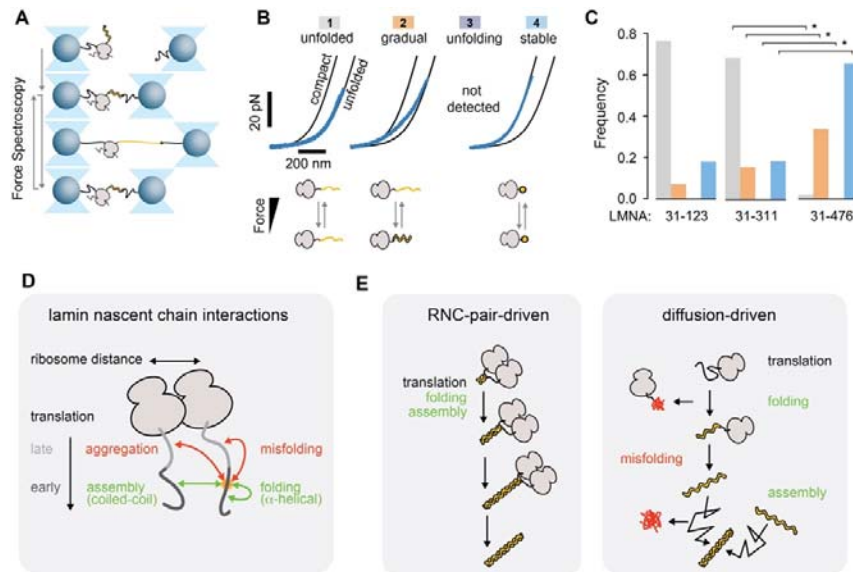

1

2 **Fig. 4: Lamin misfolds when interactions with other nascent chains are denied.** **A)** Diagram of  
 3 optical tweezer approach to probe single monomeric lamin nascent chains. Stalled ribosomes, coupled to  
 4 beads via DNA handles, translate lamin nascent chain fragments, incorporating biotin N-terminally. This  
 5 biotin is coupled to a second trapped bead via another DNA handle. The nascent chain conformations are  
 6 hence probed by repeated stretching and relaxation (grey arrows). Indicated is the transition between the  
 7 unfolded and linear  $\alpha$ -helical conformations. **B)** Classes of observed force-extension behaviour for  
 8 monomeric lamin nascent chains. Black lines indicate reference behavior for a single nascent chain being  
 9 compact (left) or fully unfolded (right). During stretch-relax cycles four classes of conformational states  
 10 are distinguished, with the majority of the chains: (1) remaining unfolded, (2) being initially compact and  
 11 extending gradually under tension, as expected for linear  $\alpha$ -helices, (3) being initially compact and  
 12 unfolding discretely below 45 pN, as expected for coiled-coil dimer structures, (4) being initially compact  
 13 and remaining so up to 45 pN, typically for multiple stretch-relax cycles, indicative of a kinetically trapped  
 14 misfolded state. Data is shown for  $LMNA_{31-476}$  fragments. **C)** Frequency of stretch-relax cycles with  
 15 specific force-extension features (see panel B), for lamin nascent chain monomers of three nascent chain  
 16 lengths ( $n = 14$   $LMNA_{31-123}$  molecules, 45 pulling cycles,  $n = 13$   $LMNA_{31-311}$  molecules, 32 pulling cycles,  $n$   
 17  $= 19$   $LMNA_{31-476}$  molecules, 67 pulling cycles). Star: significant difference ( $p < 0.05$ ). **D)** Competition  
 18 between initial lamin nascent chain interactions and factors that affect it. A given site (orange) can  
 19 engage in non-native aggregation and misfolding interactions (orange arrows), and native ( $\alpha$ -helical)  
 20 folding and (coiled-coil) assembly contacts (green arrows). The two lamin coils natively contact 'in-  
 21 register', starting with the co-localizing N-termini (Fig. 1A) at an early time point of translation. Delay of  
 22 inter-chain interactions until later phases of translation results in more competition from 'out-of-register'  
 23 aggregation and misfolding interactions between earlier and later translated segments. Larger ribosome  
 24 distances limit inter-chain interactions, which inhibits the stabilizing assembly interactions, and hence  
 25 promotes intra-chain misfolding interactions. **E)** Schematic representation of RNC-pair- and diffusion-  
 26 driven complex formation. Two nascent chains may either be synthesized first and then dimerize by  
 27 diffusion (right), or dimerize during translation by two proximal ribosomes (*co-co* assembly, left). The latter

- 1 promotes proper folding and dimer assembly, by establishing native inter-chain contacts before non-
- 2 native intra-chain contacts can form, and by limiting cytosolic exposure of protein chain monomers during
- 3 translation and diffusion. Co-co assembly of lamin coiled-coils results in progressive dimer growth, in a
- 4 process that merges  $\alpha$ -helical folding and assembly and is driven by ongoing translation.

## 1 REFERENCES

- 2 1 Kamenova, I. *et al.* Co-translational assembly of mammalian nuclear multisubunit  
3 complexes. *Nature communications* **10**, 1740, doi:10.1038/s41467-019-09749-y  
4 (2019).
- 5 2 Lin, L., DeMartino, G. N. & Greene, W. C. Cotranslational dimerization of the Rel  
6 homology domain of NF-kappaB1 generates p50-p105 heterodimers and is required  
7 for effective p50 production. *The EMBO journal* **19**, 4712-4722,  
8 doi:10.1093/emboj/19.17.4712 (2000).
- 9 3 Nicholls, C. D., McLure, K. G., Shields, M. A. & Lee, P. W. Biogenesis of p53  
10 involves cotranslational dimerization of monomers and posttranslational dimerization  
11 of dimers. Implications on the dominant negative effect. *The Journal of biological*  
12 *chemistry* **277**, 12937-12945, doi:10.1074/jbc.M108815200 (2002).
- 13 4 Redick, S. D. & Schwarzbauer, J. E. Rapid intracellular assembly of tenascin  
14 hexabrachions suggests a novel cotranslational process. *J Cell Sci* **108 ( Pt 4)**, 1761-  
15 1769 (1995).
- 16 5 Bertolini, M. *et al.* Interactions between nascent proteins translated by adjacent  
17 ribosomes drive homomer assembly. *Science* **371**, 57-64,  
18 doi:10.1126/science.abc7151 (2021).
- 19 6 Schwarz, A. & Beck, M. The Benefits of Cotranslational Assembly: A Structural  
20 Perspective. *Trends Cell Biol* **29**, 791-803, doi:10.1016/j.tcb.2019.07.006 (2019).
- 21 7 Williams, N. K. & Dichtl, B. Co-translational control of protein complex formation: a  
22 fundamental pathway of cellular organization? *Biochem Soc Trans* **46**, 197-206,  
23 doi:10.1042/BST20170451 (2018).
- 24 8 Ellis, R. J. Protein misassembly: macromolecular crowding and molecular  
25 chaperones. *Adv Exp Med Biol* **594**, 1-13, doi:10.1007/978-0-387-39975-1\_1 (2007).
- 26 9 Hartl, F. U. & Hayer-Hartl, M. Molecular chaperones in the cytosol: from nascent  
27 chain to folded protein. *Science* **295**, 1852-1858, doi:10.1126/science.1068408  
28 (2002).
- 29 10 Junker, J. P., Ziegler, F. & Rief, M. Ligand-dependent equilibrium fluctuations of  
30 single calmodulin molecules. *Science* **323**, 633-637, doi:10.1126/science.1166191  
31 (2009).
- 32 11 Dill, K. A. & MacCallum, J. L. The protein-folding problem, 50 years on. *Science* **338**,  
33 1042-1046, doi:10.1126/science.1219021 (2012).
- 34 12 Kaiser, C. M., Goldman, D. H., Chodera, J. D., Tinoco, I., Jr. & Bustamante, C. The  
35 ribosome modulates nascent protein folding. *Science* **334**, 1723-1727,  
36 doi:10.1126/science.1209740 (2011).
- 37 13 Phillip, Y. & Schreiber, G. Formation of protein complexes in crowded environments--  
38 from in vitro to in vivo. *Febs Lett* **587**, 1046-1052, doi:10.1016/j.febslet.2013.01.007  
39 (2013).
- 40 14 De Simone, A. *et al.* Intrinsic disorder modulates protein self-assembly and  
41 aggregation. *Proceedings of the National Academy of Sciences of the United States*  
42 *of America* **109**, 6951-6956, doi:10.1073/pnas.1118048109 (2012).
- 43 15 Halbach, A. *et al.* Cotranslational assembly of the yeast SET1C histone  
44 methyltransferase complex. *The EMBO Journal* **28**, 2959-2970,  
45 doi:10.1038/emboj.2009.240 (2009).
- 46 16 Shiber, A. *et al.* Cotranslational assembly of protein complexes in eukaryotes  
47 revealed by ribosome profiling. *Nature* **561**, 268-272, doi:10.1038/s41586-018-0462-  
48 y (2018).
- 49 17 Shieh, Y.-W. *et al.* Operon structure and cotranslational subunit association direct  
50 protein assembly in bacteria. *Science* **350**, 678-680, doi:10.1126/science.aac8171  
51 (2015).
- 52 18 Wells, J. N., Bergendahl, L. T. & Marsh, J. A. Operon Gene Order Is Optimized for  
53 Ordered Protein Complex Assembly. *Cell reports* **14**, 679-685,  
54 doi:10.1016/j.celrep.2015.12.085 (2016).

- 1 19 Williams, N. K. & Dichtl, B. Co-translational control of protein complex formation: a  
2 fundamental pathway of cellular organization? *Biochemical Society Transactions* **46**,  
3 197-206, doi:10.1042/bst20170451 (2018).
- 4 20 Duncan, C. D. & Mata, J. Widespread cotranslational formation of protein complexes.  
5 *PLoS Genet* **7**, e1002398, doi:10.1371/journal.pgen.1002398 (2011).
- 6 21 Wruck, F., Katranidis, A., Nierhaus, K. H., Büldt, G. & Hegner, M. Translation and  
7 folding of single proteins in real time. *Proceedings of the National Academy of*  
8 *Sciences* **114**, E4399-E4407, doi:10.1073/pnas.1617873114 (2017).
- 9 22 Holtkamp, W. *et al.* Cotranslational protein folding on the ribosome monitored in real  
10 time. *Science* **350**, 1104-1107, doi:10.1126/science.aad0344 (2015).
- 11 23 McKeon, F. D., Kirschner, M. W. & Caput, D. Homologies in both primary and  
12 secondary structure between nuclear envelope and intermediate filament proteins.  
13 *Nature* **319**, 463-468 (1986).
- 14 24 van Steensel, B. & Belmont, A. S. Lamina-Associated Domains: Links with  
15 Chromosome Architecture, Heterochromatin, and Gene Repression. *Cell* **169**, 780-  
16 791, doi:10.1016/j.cell.2017.04.022 (2017).
- 17 25 Worman, H. J. & Bonne, G. "Laminopathies": A wide spectrum of human diseases.  
18 *Exp Cell Res* **313**, 2121-2133, doi:10.1016/j.yexcr.2007.03.028 (2007).
- 19 26 Fisher, D. Z., Chaudhary, N. & Blobel, G. cDNA sequencing of nuclear lamins A and  
20 C reveals primary and secondary structural homology to intermediate filament  
21 proteins. *Proceedings of the National Academy of Sciences of the United States of*  
22 *America* **83**, 6450-6454, doi:10.1073/pnas.83.17.6450 (1986).
- 23 27 Weber, K., Plessmann, U. & Traub, P. Maturation of nuclear lamin A involves a  
24 specific carboxy-terminal trimming, which removes the polyisoprenylation site from  
25 the precursor; implications for the structure of the nuclear lamina. *Febs Lett* **257**,  
26 411-414, doi:10.1016/0014-5793(89)81584-4 (1989).
- 27 28 Sinensky, M. *et al.* The processing pathway of prelamin A. *J Cell Sci* **107 ( Pt 1)**, 61-  
28 67 (1994).
- 29 29 Herrmann, H., Bar, H., Kreplak, L., Strelkov, S. V. & Aebi, U. Intermediate filaments:  
30 from cell architecture to nanomechanics. *Nature reviews. Molecular cell biology* **8**,  
31 562-573, doi:10.1038/nrm2197 (2007).
- 32 30 Stuurman, N., Heins, S. & Aebi, U. Nuclear lamins: Their structure, assembly, and  
33 interactions. *J Struct Biol* **122**, 42-66, doi:DOI 10.1006/jsbi.1998.3987 (1998).
- 34 31 Dechat, T. *et al.* Nuclear lamins: major factors in the structural organization and  
35 function of the nucleus and chromatin. *Genes Dev* **22**, 832-853,  
36 doi:10.1101/gad.1652708 (2008).
- 37 32 Kolb, T., Maass, K., Hergt, M., Aebi, U. & Herrmann, H. Lamin A and lamin C form  
38 homodimers and coexist in higher complex forms both in the nucleoplasmic fraction  
39 and in the lamina of cultured human cells. *Nucleus* **2**, 425-433,  
40 doi:10.4161/nucl.2.5.17765 (2011).
- 41 33 Ye, Q. & Worman, H. J. Protein-protein interactions between human nuclear lamins  
42 expressed in yeast. *Exp Cell Res* **219**, 292-298 (1995).
- 43 34 Miller, O. L., Jr., Hamkalo, B. A. & Thomas, C. A., Jr. Visualization of bacterial genes  
44 in action. *Science* **169**, 392-395, doi:10.1126/science.169.3943.392 (1970).
- 45 35 Brandt, F. *et al.* The native 3D organization of bacterial polysomes. *Cell* **136**, 261-  
46 271, doi:10.1016/j.cell.2008.11.016 (2009).
- 47 36 Xi, Z., Gao, Y., Sirinakis, G., Guo, H. & Zhang, Y. Single-molecule observation of  
48 helix staggering, sliding, and coiled coil misfolding. *Proceedings of the National*  
49 *Academy of Sciences of the United States of America* **109**, 5711-5716,  
50 doi:10.1073/pnas.1116784109 (2012).
- 51 37 Luedtke, N. W., Dexter, R. J., Fried, D. B. & Schepartz, A. Surveying polypeptide and  
52 protein domain conformation and association with FIAsH and ReAsH. *Nature*  
53 *Chemical Biology* **3**, 779-784, doi:10.1038/nchembio.2007.49 (2007).
- 54 38 Wolny, M. *et al.* Stable single  $\alpha$ -helices are constant force springs in proteins. *Journal*  
55 *of Biological Chemistry* **289**, 27825-27835 (2014).

- 1 39 Schwaiger, I., Sattler, C., Hostetter, D. R. & Rief, M. The myosin coiled-coil is a truly  
2 elastic protein structure. *Nature materials* **1**, 232-235 (2002).
- 3 40 Bornschlogl, T. & Rief, M. Single-molecule dynamics of mechanical coiled-coil  
4 unzipping. *Langmuir* **24**, 1338-1342, doi:10.1021/la7023567 (2008).
- 5 41 Bechtluft, P. *et al.* Direct observation of chaperone-induced changes in a protein  
6 folding pathway. *Science* **318**, 1458-1461, doi:10.1126/science.1144972 (2007).
- 7 42 Lin, M. M., Shorokhov, D. & Zewail, A. H. Dominance of misfolded intermediates in  
8 the dynamics of alpha-helix folding. *Proceedings of the National Academy of  
9 Sciences of the United States of America* **111**, 14424-14429,  
10 doi:10.1073/pnas.1416300111 (2014).
- 11 43 Natan, E. *et al.* Cotranslational protein assembly imposes evolutionary constraints on  
12 homomeric proteins. *Nature structural & molecular biology* **25**, 279-288,  
13 doi:10.1038/s41594-018-0029-5 (2018).
- 14 44 Elzeneini, E. & Wickstrom, S. A. Lipodystrophic laminopathy: Lamin A mutation  
15 relaxes chromatin architecture to impair adipogenesis. *J Cell Biol* **216**, 2607-2610,  
16 doi:10.1083/jcb.201707090 (2017).
- 17 45 Cerullo, F. *et al.* Bacterial ribosome collision sensing by a MutS DNA repair ATPase  
18 paralogue. *Nature* **603**, 509-514, doi:10.1038/s41586-022-04487-6 (2022).
- 19 46 Ahn, J. *et al.* Structural basis for lamin assembly at the molecular level. *Nature  
20 Communications* **10**, 3757, doi:10.1038/s41467-019-11684-x (2019).

21
